# Supplementary material
Source: PubMed Central journal article supplement (PMC5730345)
Supplement: NIHMS919104-supplement.pdf [file NIHMS919104-supplement.pdf]

## Supplementary Table: The BRIDGE Investigators

**Principal Investigators:** Thomas Ortel, Duke University Medical Center (Clinical Coordinating Center), and Vic Hasselblad, Duke University Medical Center (Data Coordinating Center).

**Steering Committee:** Joseph Caprini (NorthShore University HealthSystem), James Douketis (St Joseph's Healthcare), Andrew Dunn (Mount Sinai Medical Center), David Garcia (University of Washington Medical Center), Alan Jacobson (VA Loma Linda Healthcare System), Amir Jaffer (Rush University Medical Center), Scott Kaatz (Hurley Medical Center), Sam Schulman (Hamilton Health Science Center), Alex Spyropoulos (Hofstra, North Shore/Long Island Jewish School of Medicine), and Alexander G. G. Turpie (McMaster University).

**Executive Committee:** Thomas Ortel (Chair, Duke University Medical Center), Richard Becker (University of Cincinnati), Nathan Clark (Kaiser Permanente Colorado), Barbara Conti (Owen Sound Family Health), Stacey Ellsworth (Henry Ford Hospital), Robert Harrison (Duke University Medical Center), Gerhard Johnson (Minneapolis VA Medical Center), David Kong (Duke University Medical Center), Arun Krishnamoorthy (Duke University Medical Center), Sebastian Palmeri (Robert Wood Johnson ), Jorge Saucedo (NorthShore University HealthSystem), Patricia Schoch (VA Eastern Colorado Health Care System), Debbie Tallman (ABQ Health Partners), and Dan Witt (University of Utah).

**Site Investigators (names listed alphabetically by last name of current investigator [facility, subjects enrolled])**

### Canada:

Mark Blostein (SMDB Jewish General Hospital, 22); Benoit Coutu (CHUM-Hotel-Dieu, 19); James Douketis (Saint Joseph's Healthcare Hamilton, 85); Francois Grondin (Clinique de Cardiologie de Levis, 2); Peter Gross (Hamilton Health Sciences, 3); Marc Jolicoeur and Bernard Thibault (Montreal Heart Institute, 1); Yves Pesant (Saint Jerome Medical Research, Inc., 1); Thomas Rebane (Entralogix Clinical Research, Inc., 1); Jennifer Ringrose and Bruce Ritchie (University of Alberta Hospital, 1); Simon Robinson, Peter Klinke, and Reginald Smith (Victoria Heart Institute Foundation, 70); Sam Schulman and Alex Spyropoulos (Hamilton Sciences, 218); Frederick Spencer (Hamilton Health Sciences – McMaster University, 21); Erik Yeo (University Health Network, 9).

### United States:

Joon Ahn and J. Jeffrey Marshall (Northeast Georgia Heart Center, 2); Charles Allen III (Mission Hospital, 5); Alpesh Amin (University of California Irvine Medical Center, 3); Mary Anderson (Malcom Randall VA Medical Center, 2); Tammy Anthony (Syracuse VA Medical Center, 19); Mark Antonishen (Northern Michigan Regional Hospital, 1); Gowthami Arepally (Duke University Medical Center, 45); Michael Baker (Vanderbilt University Medical Center, 5); Anthony Bartkowiak Jr. (Blair Medical Associates, Inc., 13); Kim Baty and Leon Menajovsky (Scott and White Memorial Hospital, 25); Carlos Bayron (Interventional Cardiac Consultants, 2); Seth Bilazarian (Pentucket Medical Associates, 4); Paris Bransford (Southeast Texas Cardiology Associates, 6); Kevin Browne Jr. (Watson Clinic Center for Research Inc., 5); David Buccigrossi (Kaiser Permanente, 50); A. Bleakley Chandler Jr. (University Cardiology Associates, LLC, 10); Nathan Clark and Dan Witt (Kaiser Permanente, 90); Barry Clemson (Penn State Milton S. Hershey Medical Center, 1); Steven Cohn and Amir Jaffer (University of Miami Hospital, 7); Vincent Colucci (International Heart Institute of Montana, 11); Jean Connors (Brigham and Women's Hospital, 4); Stephen Culp (Sarasota Memorial Hospital, 19); Mark Donahue and Gowthami Arepally (Durham VA Medical Center, 1); Gregory Eberhart and Richard Primm (Wenatchee Valley Medical Center, 21);

Matthew Eisen (MetroHealth System, 20); Steven Eisenberg (Saint Joseph's Hospital of Atlanta, 5); Georg Emlein (Sacramento Heart and Vascular Medical Associates), 2); Bishoy Faltas (Rochester General Hospital, 2); Steven Forman (Los Alamitos Cardiovascular, 13); William French (Harbor-University of California Los Angeles Medical Center, 34); David Garcia (University of New Mexico Cancer Center, 12); Steven Georgeson (Somerset Medical Center, 5); Douglas Geraets (Iowa City VA Medical Center, 31); Santosh Gill (Fox Valley Clinical Research Center, LLC, 9); Eve Gillespie (Kalispell Regional Medical Center, 35); Robert Glover (Cardiology Group of Western New York, 5); Swapna Goday and Margaret Kennedy (Western Pennsylvania Hospital, 2, and Allegheny General Hospital, 9); Joel Gore (University of Massachusetts Memorial Medical Center, 55); Jaspal Gujral (Georgia Regents University, 31); Anjan Gupta (Aurora Cardiovascular Services, 4); Tariq Haddad (The Cardiovascular Group, 2); Monica Hazelrigg (McGuire VA Medical Center, 19); Steven Herson and Stephan Hoeing (Emerson Hospital, 2); William Herzog Jr. (Cardiovascular Specialists of Central Maryland, 4); Robert Hill (Kootenai Heart Clinics, LLC, 35); Marie Iacona (Buffalo Heart Group, 1); Alan Jacobson (VA Loma Linda Healthcare System, 49); Gerhard Johnson (Minneapolis VA Medical Center, 31); Kenneth Kellick (VA Western New York Healthcare System, 1); Muhammad Khan (Cardiac Center of Texas, P.A., 18); Nicholas Kondo (Saratoga Cardiology Associates, 7); Rekha Lakshmanan (Saint John's Mercy Heart Hospital, 2); Joel Landzberg (Westwood Cardiology, 14); Thomas LeGalley (Upper Michigan Cardiovascular Associates, PC, 1); Satyaprakash Makam (Cardiovascular Research of Northwest Indiana, 20); Amit Malhotra and Frank McGrew (Stern Cardiovascular Foundation, 16); William Martin (Saint Charles Anticoagulation Clinic, 6); Brent McLaurin (AnMed Health Medical Center, 2); Daniel Meyer (Maine Medical Center, 18); Freny Mody (VA Greater Los Angeles Healthcare System, 23); Visala Muluk (VA Pittsburgh Healthcare System, 17); Wayne Old (Cardiovascular Associates, Ltd., 3); Brian Peek (Charles George VA Medical Center, 37); Robert Pendleton (University of Utah Hospitals and Clinics, 8); John Petersen (Swedish Medical Center – Providence Campus, 2); Arnold Pfahl (North Colorado Medical Center, 1); Kurt Pfeifer (Medical College of Wisconsin, 10); Guna Raj (Dallas VA Medical Center, 7); Vijay Rao (Saint Francis Hospital and Health Centers, 10); David Rater (Iowa Physicians Clinic Medical Foundation, 39); Cheryl Ray and Mary Zimmerman (William S. Middleton Memorial Veterans Hospital, 13); Charles Russo (Holy Cross Hospital, 14); Joseph Sacco (Albany Stratton VA Medical Center, 17); Abraham Salacata (Endeavor Medical Research, 8); Jorge Saucedo and Suman Rathbun (University of Oklahoma Health Sciences Center, 10); Brian Schietinger and Matthew Sackett (Centra Health Cardiovascular Group, 9); Ricky Schneider (Holy Cross Medical Group, 2); Patricia Schoch (VA Eastern Colorado Health Care System, 97); Vinay Shah and Scott Kaatz (Henry Ford Hospital and Hurley Medical Center, 50); Tatjana Sljapic (Heart Specialists of Lancaster, 7); Carlos Sotolongo (Baptist Heart Specialists, 3); Shawn Speirs (Eastern Idaho Medical Consultants, 13); Daniel Sporn and Kishore Harjai (The Guthrie Clinic, 9); Alex Spyropoulos (North Shore University Hospital, 15); Michael Staab (South Denver Cardiology Associates, PC, 27); Robert Stein (Pen Bay Medical Center, 25); Carl Sufit and Steven Mitnick (Sutter Gould Medical Foundation, 4); Darren Traub (Saint Luke's Hospital and Health Network, 6); Annabelle Volgman and Stuart Rosenbush (University Cardiologists, 13); Robert Watson III (Abington Medical Specialists, 1); Keattiyoat Wattanakit, Barry Clemson, and Roy McRae Jr. (HeartCare Midwest, 5); Richard White (University of California Davis Medical Center, 41); Robert Williams (Bronson Healthcare Group, 8); Brian Williamson (William Beaumont Hospital – Troy, 4).

**Data Safety Monitoring Board:** Ken Bauer (Chair, Beth Israel Deaconess Medical Center), Charles Francis (Past Chair, Rochester University), Nancy King (Wake Forest University), KyungMann Kim (University of Wisconsin–Madison), Agnes Lee (Diamond Health Care Centre), Cindy Leissing (Tulane University Health Sciences Center), Mike Lincoff (Cleveland Clinic), Ellis Neufeld (Boston Children's Hospital), Rajiv Pruthi (Mayo Clinic), Jeffrey Rade (Johns Hopkins University), Robin Roberts (Henderson Research Centre).

**Duke Clinical Research Institute: Project Management:** Wanda Parker (Project Leader), Doris Hunte, and Molly Rich. **Clinical Data Management:** Carla Anderson, Michelle McClanahan-Crowder, Gail Grissom, Valerie Jackson, Chandra Kumar, Brenda Nicholson, and Omar Thompson. **Clinical Operations:** Patty Darragh (Lead CRA), Beth Evans, Joan Albright, Vicky Copeland, Catherine Hancock, Emlie Johnson, Arun Krishnamoorthy, Benjamin Lee, Ed McGuire, Mary Molina, Tina Richard, Lola Spencer, Ryan Stults, and Shamina Williams. **Clinical Trials Statistics:** Gudaye Tasissa, Yuliya Lokhnygina, Heather Woods, and Qinghong Yang. **Communications:** Catherine Bodine and Carol Walker. **Integrated Clinical Events:** Renato Lopes (Chair), Zubin Eapen, Gerald Esposito, Deborah Greene, Robert Harrison, Bradley Kolls, David Kong, Arun Krishnamoorthy, Chandra Kumar, Kourtneye Owens, Sumeet Suberwal, and Wayne Tsyuang. **Regulatory Services:** Rose Beci and David Jensen. **Safety Surveillance:** Maria Butts, Chandra Kumar, Barbara Kuzil, and Maunette Tait.
